# Supplementary material for: Learning Curve of Transperineal MRI/US Fusion Prostate Biopsy: 4-Year Experience
Source: MDPI journal article supplement (doi:10.3390/life13030638), 2023-02-24
Supplement: s1 [file s1]

Supplementary Table S1. Image parameters.

|                        | T2WI    | DWI     | DCE     |
|------------------------|---------|---------|---------|
| Sequence               | SE      | EP/SE   | GR      |
| TE                     | 126     | 71      | 1.32    |
| TR                     | 3500    | 5725    | 3.708   |
| FOV (cm)               | 20      | 20      | 24      |
| Slice thickness (mm)   | 3       | 3       | 4       |
| Matrix                 | 256x256 | 100x130 | 128x128 |
| Time (min'sec)         | 3'40    | 6'40    | 5'50    |
| spacing between slices | 4       | 4       | 4       |
| Flip angle             | 90      | 90      | 12      |
| B value                | -       | 1000    | -       |
| Phase number           | -       | -       | 36      |
